# Supplementary material for: Elucidating cardiomyocyte heterogeneity and maturation dynamics through integrated single-cell and spatial transcriptomics
Source: PubMed Central journal article supplement — iScience. 2024 Dec 13;28(1):111596. doi: 10.1016/j.isci.2024.111596 (PMC11732507; doi:10.1016/j.isci.2024.111596), 2024-12-13

iScience, Volume 28

## **Supplemental information**

### **Elucidating cardiomyocyte heterogeneity and maturation dynamics through integrated single-cell and spatial transcriptomics**

**Xiaoying Wang, Lizhi Cao, Rui Chang, Junwei Shen, Linlin Ma, and Yanfei Li**

**Figure S1. Comparative analysis of scRNA samples before and after filtration, related to Figure 1.**

(A) scRNA samples before filtering. (B) scRNA samples after filtration.

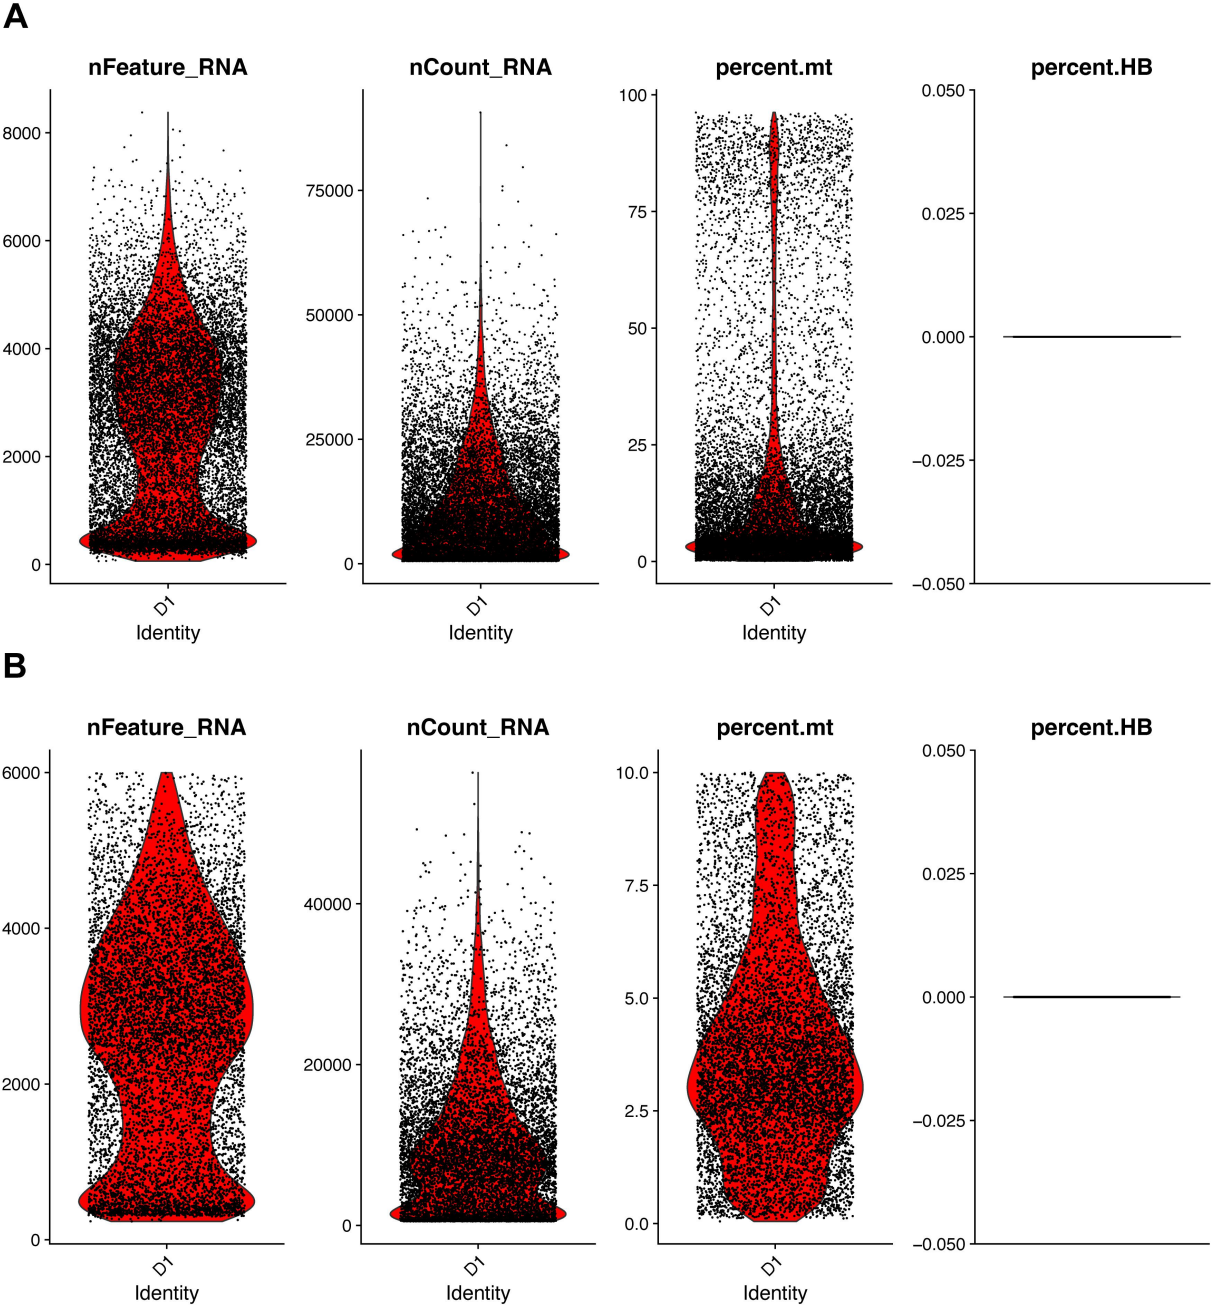

Supplement: mmc1.pdf [file mmc1.pdf]
